# Supplementary material for: A versatile nanoplatform based on multivariate porphyrinic metal–organic frameworks for catalytic cascade-enhanced photodynamic therapy
Source: Royal Society of Chemistry journal article supplement (doi:10.1039/d0tb02652b), 2021-01-01
Supplement: d0tb02652b1.pdf [file d0tb02652b1.pdf]

## Supporting Information

# A versatile nanoplatform based on multivariate porphyrinic metal-organic frameworks for catalytic cascades-enhanced photodynamic therapy

*Shen-Zhen Ren*<sup>a, b, †</sup>, *Xiao-Hua Zhu*<sup>b, †</sup>, *Bin Wang*<sup>b</sup>, *Ming Liu*<sup>b</sup>, *Shu-Kai Li*<sup>b</sup>, *Yu-Shun Yang*<sup>b, \*</sup>, *Hailong An*<sup>a, \*</sup> and *Hai-Liang Zhu*<sup>b, \*</sup>

<sup>a</sup> Key Laboratory of Molecular Biophysics, Hebei Province, Institute of Biophysics, School of Sciences, Hebei University of Technology, Tianjin 300401, China

<sup>b</sup> State Key Laboratory of Pharmaceutical Biotechnology, School of Life Sciences, Nanjing University, Nanjing 210023, China

<sup>†</sup> These two authors equally contributed to this paper.

<sup>\*</sup> Corresponding authors. Tel. & fax: +86-25-89682572; E-mail: zhuhl@nju.edu.cn (H.L. Zhu); hailong\_an@hebut.edu.cn (H.L. An); milanargint@163.com (Y.S. Yang).

## Statistical Analysis.

All the experiments were repeated at least in triplicate, and the results were presented as mean  $\pm$  standard deviation (SD). The statistical analysis was performed by using Origin 8.0 software. Statistical significance was determined using two-tailed Student's tests to compare between groups and P value  $<0.05$  was considered statistically significant. \* $p < 0.05$ ; \*\* $p < 0.01$ ; \*\*\* $p < 0.001$ .

**Table S1.** List of abbreviations in this study

| Full name | Abbreviations                                         |
|-----------|-------------------------------------------------------|
| TCPP      | Tetratopic tetrakis(4-carboxyphenyl) porphyrin        |
| DA        | Dopamine                                              |
| PDA       | Polydopamine                                          |
| UIO       | UIO-66-NH <sub>2</sub> @TCPP                          |
| UIO@PDA   | UIO-66-NH <sub>2</sub> @TCPP@PDA                      |
| UIO@Ca    | UIO-66-NH <sub>2</sub> @TCPP@CaO <sub>2</sub> @PDA    |
| UIO@Pt    | UIO-66-NH <sub>2</sub> @TCPP@PDA@Pt                   |
| UIO@Ca-Pt | UIO-66-NH <sub>2</sub> @TCPP@CaO <sub>2</sub> @PDA@Pt |

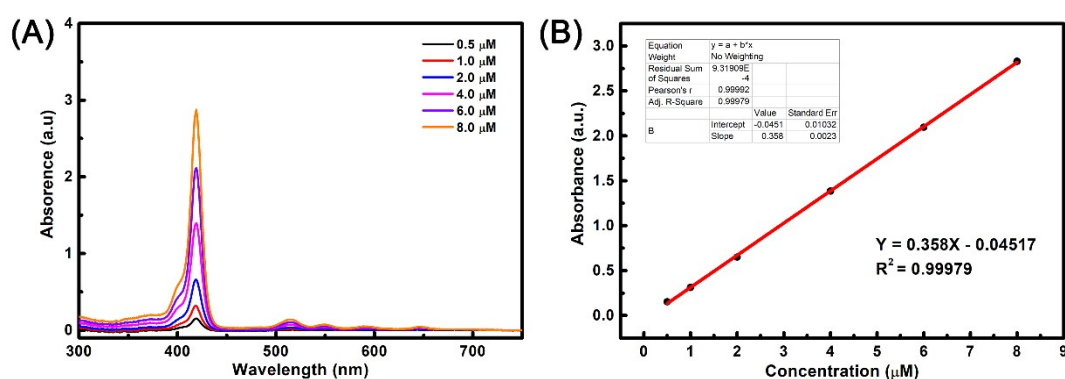

**Fig. S1.** UV-vis spectroscopy and standard curve of TCPP in DMF with different concentrations.

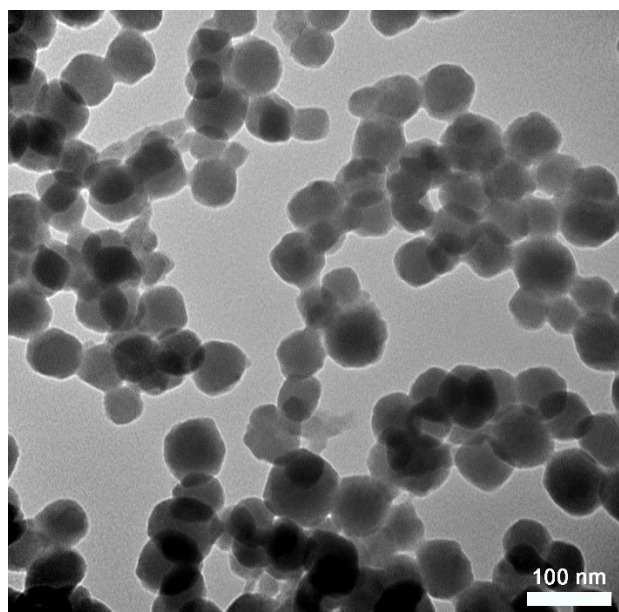

**Fig. S2.** TEM image of UIO@PDA NPs.

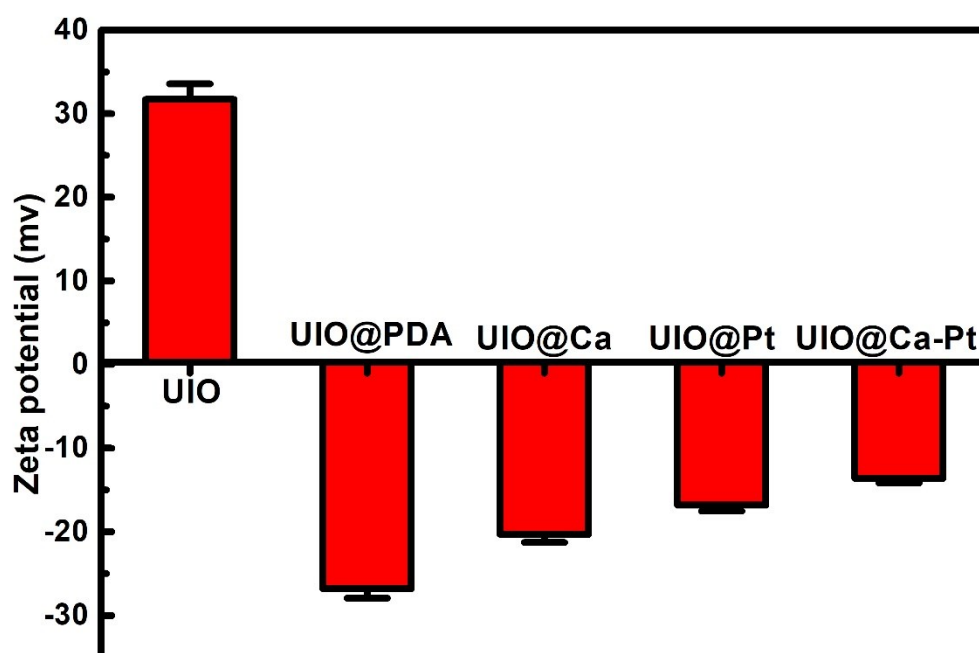

**Fig. S3.**  $\zeta$ -potentials of UIO, UIO@PDA, UIO@Ca, UIO@Pt and UIO@Ca-Pt. All results were presented as mean  $\pm$  SD.

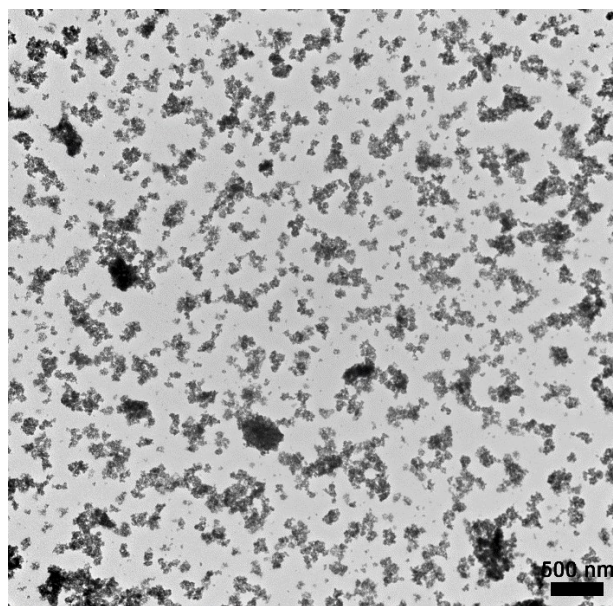

**Fig. S4.** TEM image of CaO<sub>2</sub> NPs.

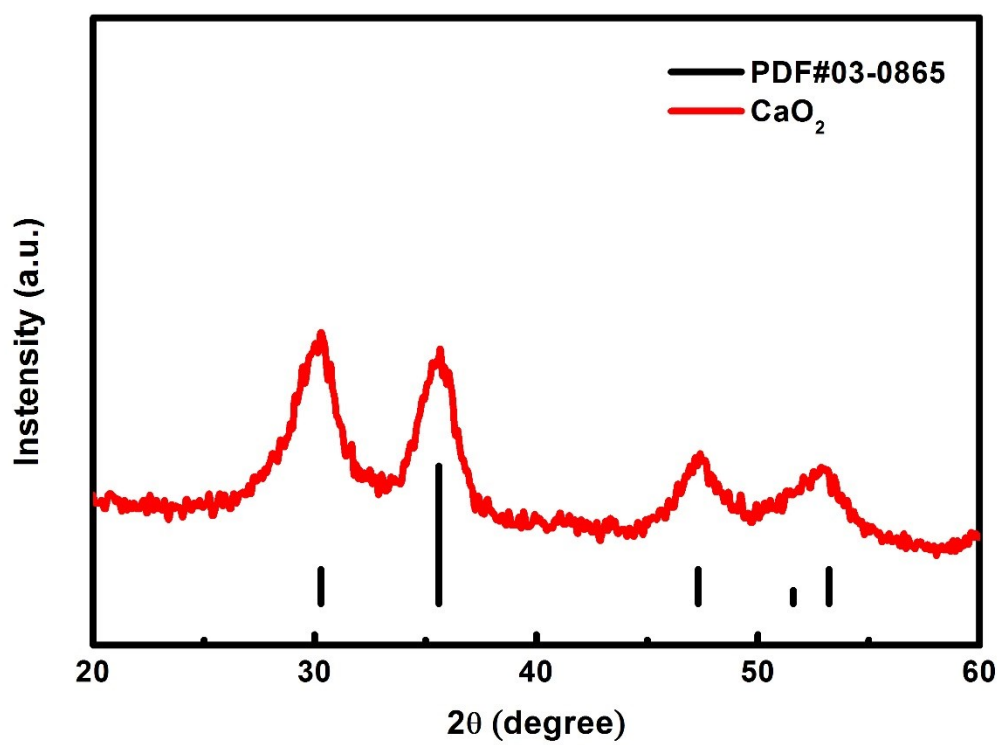

**Fig. S5.** XRD patterns of CaO<sub>2</sub> NPs.

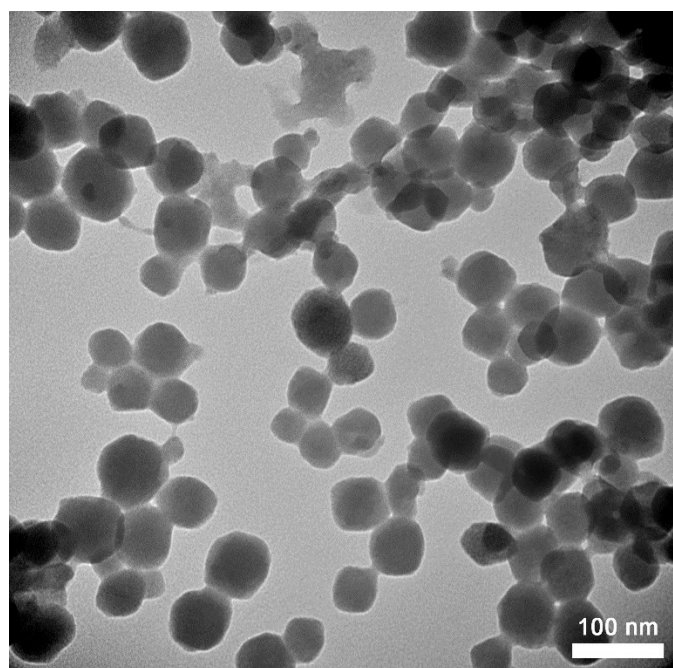

**Fig. S6.** TEM of UIO@Ca NPs.

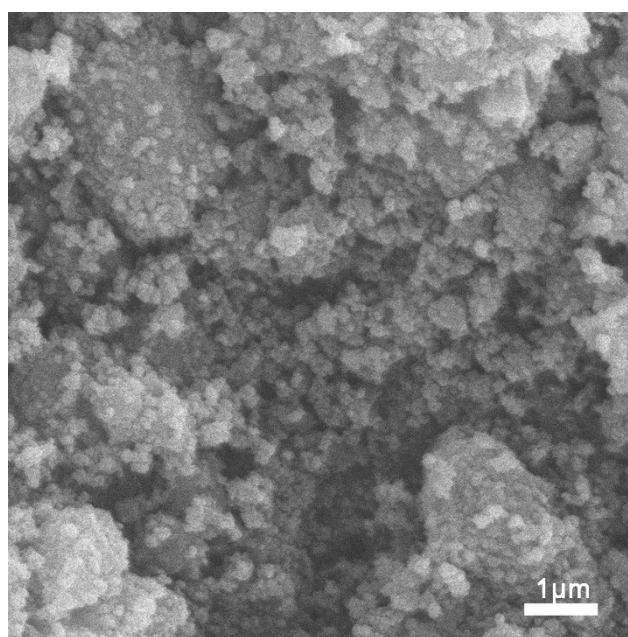

**Fig. S7.** SEM of UIO@Ca-Pt NPs

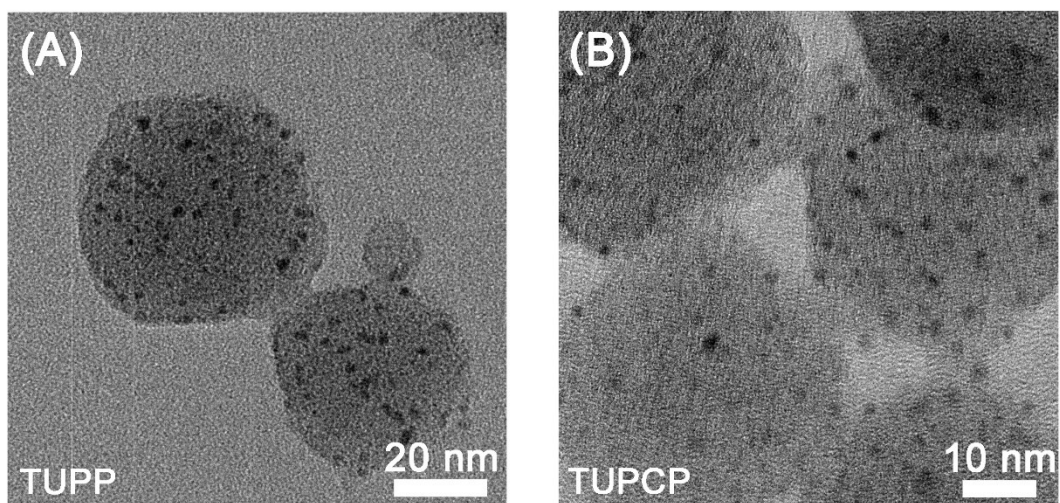

**Fig. S8.** TEM images of UiO@ Pt and UiO@Ca-Pt.

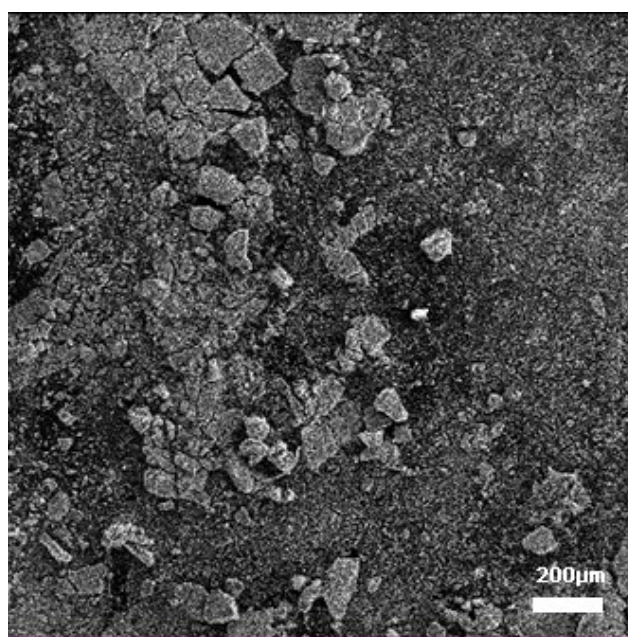

**Fig. S9.** Electronic image of EDX of UiO@Ca-Pt.

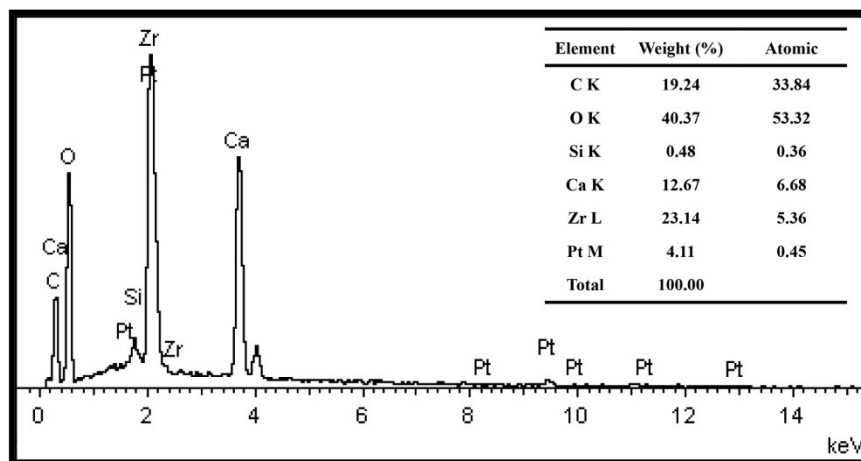

**Fig. S10.** EDX spectrum of UIO@Ca-Pt.

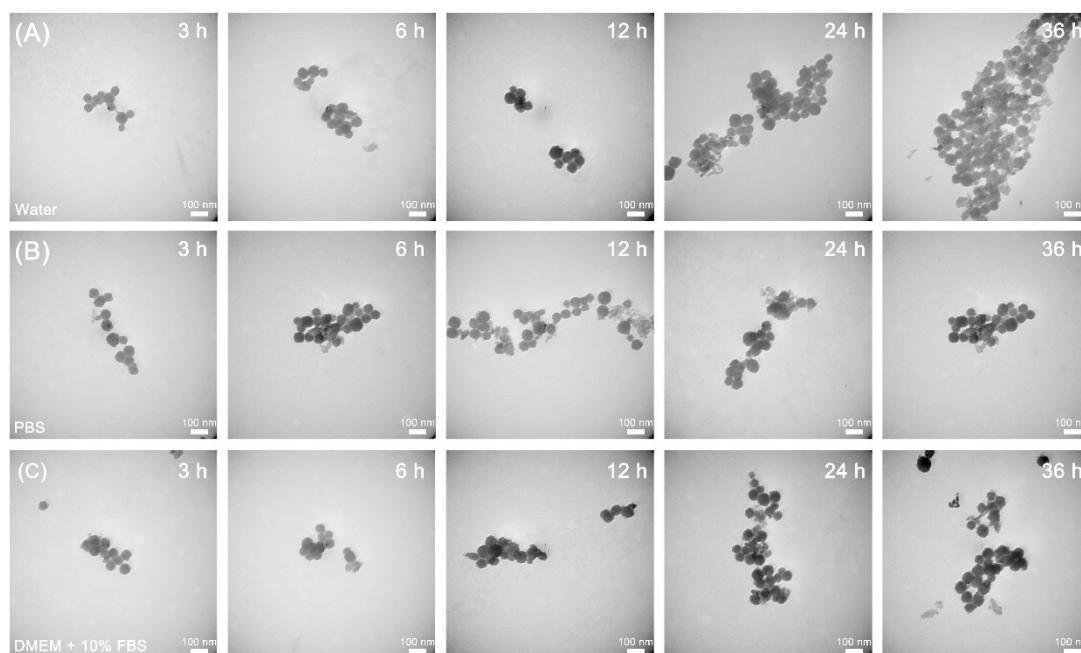

**Fig. S11.** TEM images of UIO@Ca-Pt after incubating with water (A), PBS (B) or DMEM containing 10% FBS (C) for 3, 6, 12, 24 or 48 h.

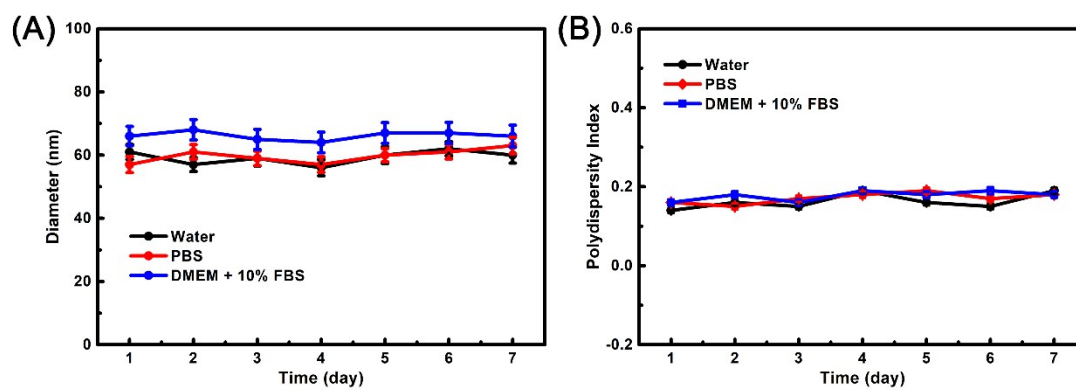

**Fig. S12.** Colloidal characterization of UIO@Ca-Pt in water, PBS or DMEM containing 10% FBS for different time (A) and corresponding polydispersity index (B). All results were presented as mean  $\pm$  SD.

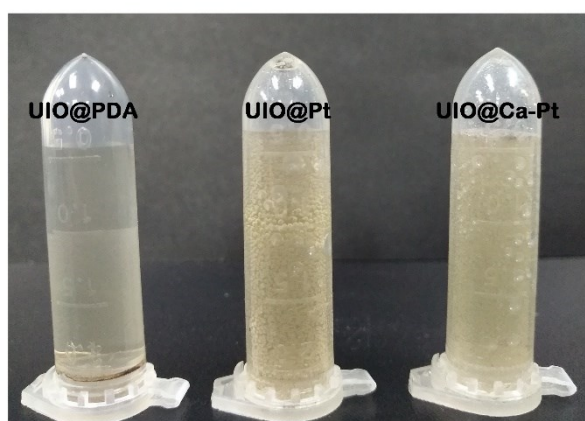

**Fig. S13.** A photo of hydrogen peroxide added to UIO@PDA, UIO@Pt, and UIO@Ca-Pt nanosolutions.

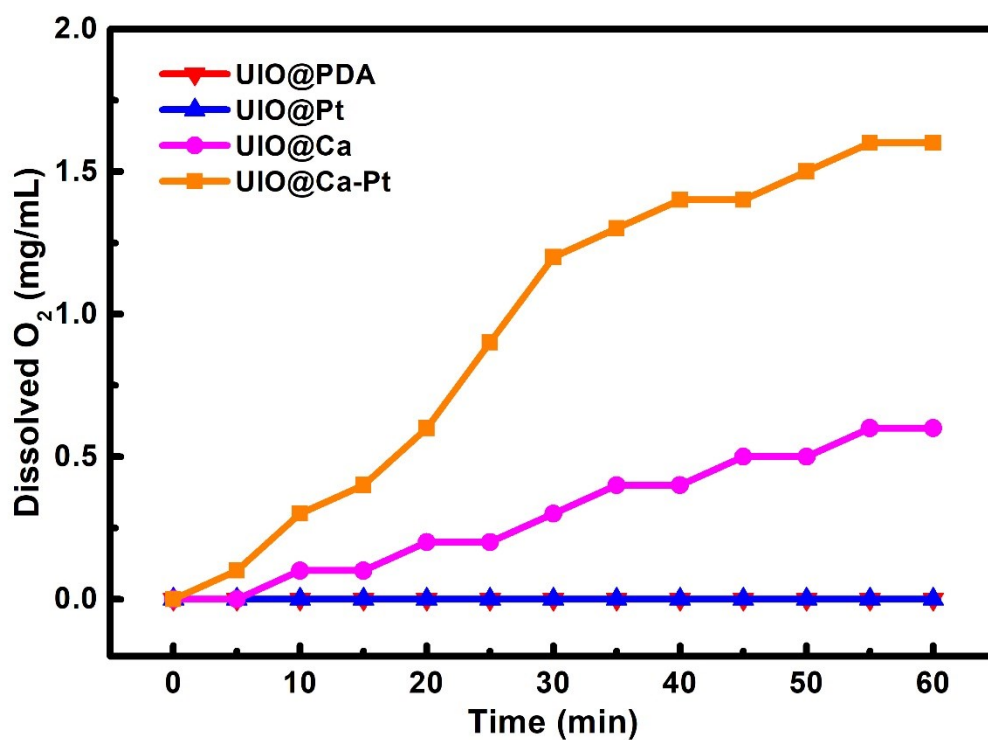

**Fig. S14.** Oxygen concentration changes of UIO@PDA, UIO@Pt, UIO@Ca and UIO@Ca-Pt solutions in the absence of  $H_2O_2$ .

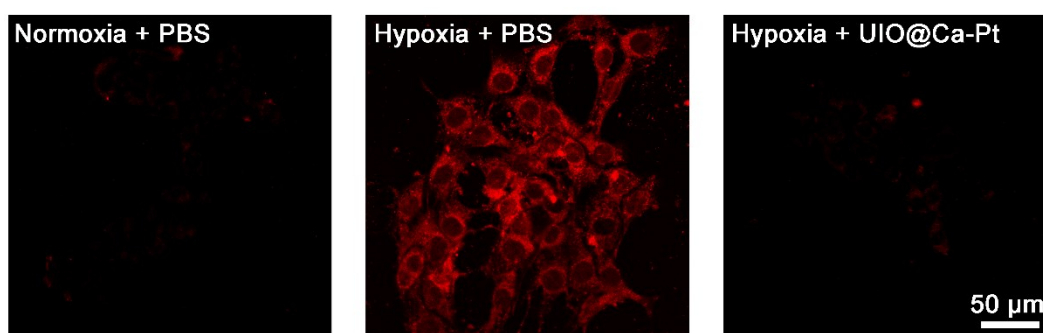

**Fig. S15.** Fluorescence images of cells treated using  $[Ru(dpp)_3]Cl_2$  under different oxygen concentrations. Scale bars=50  $\mu m$ .

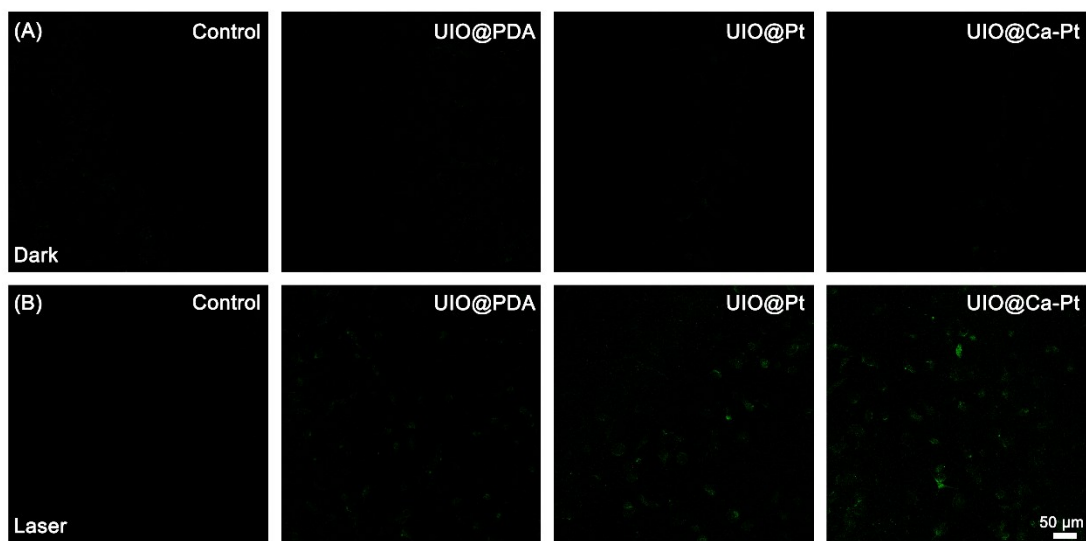

**Fig. S16.** Intracellular  $^1\text{O}_2$  (detected with SOSG) detection of CT26 cells incubated with different samples for 4 h and then with (A) or without (B) laser irradiation.

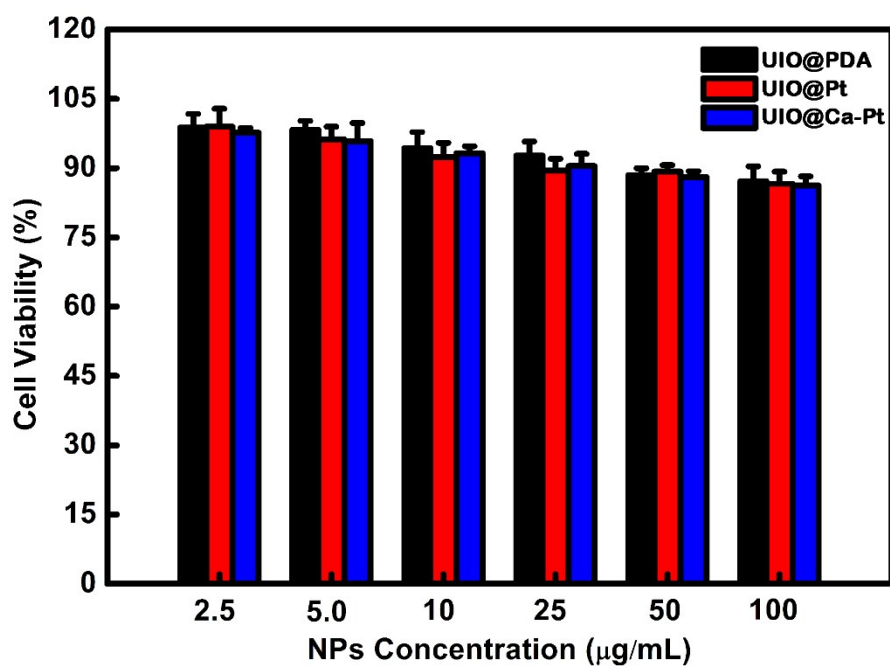

**Fig. S17.** Cell viability of 293T cells treated with UIO@PDA, UIO@Pt and UIO@Ca-Pt NPs with different concentrations in the dark conditions for 48 h. All results were presented as mean  $\pm$  SD.

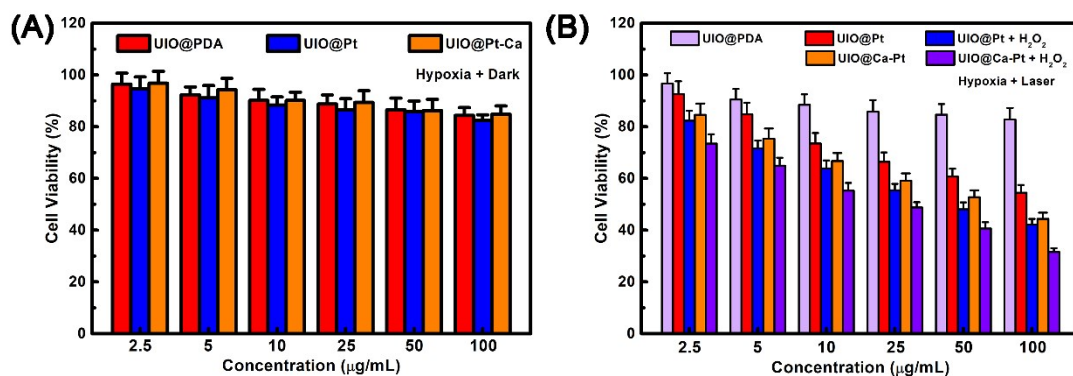

**Fig. S18.** Cell viability of CT26 cells treated with different samples for 4 h under hypoxia conditions and then with (A) or without (B) laser irradiation. All results were presented as mean  $\pm$  SD.

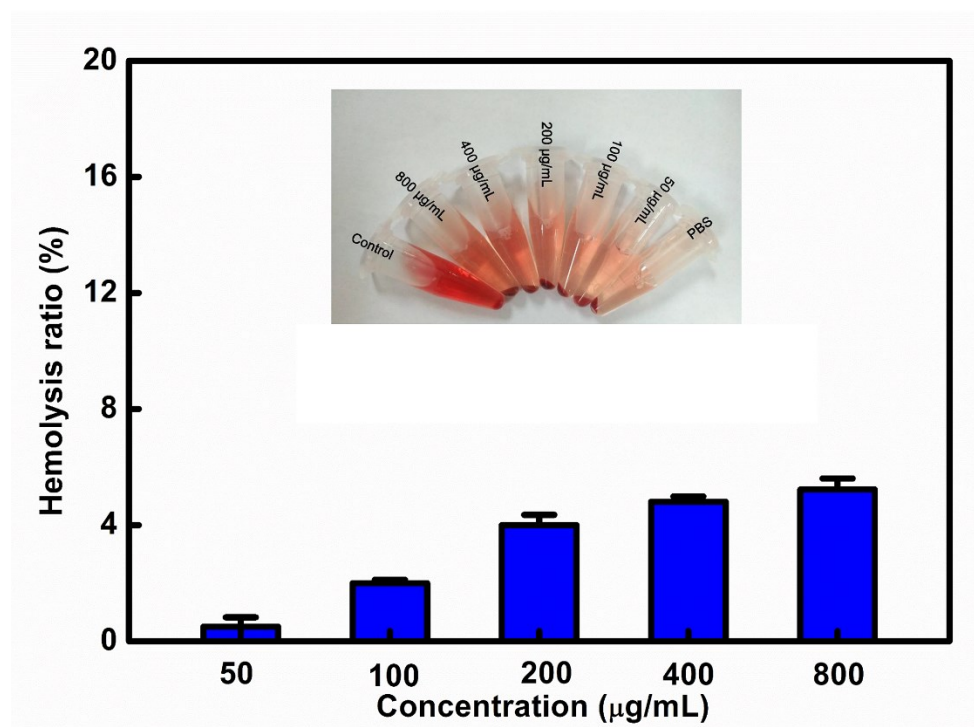

**Fig. S19.** Hemolysis percentages of UIO@Ca-Pt NPs at different concentrations. All results were presented as mean  $\pm$  SD.

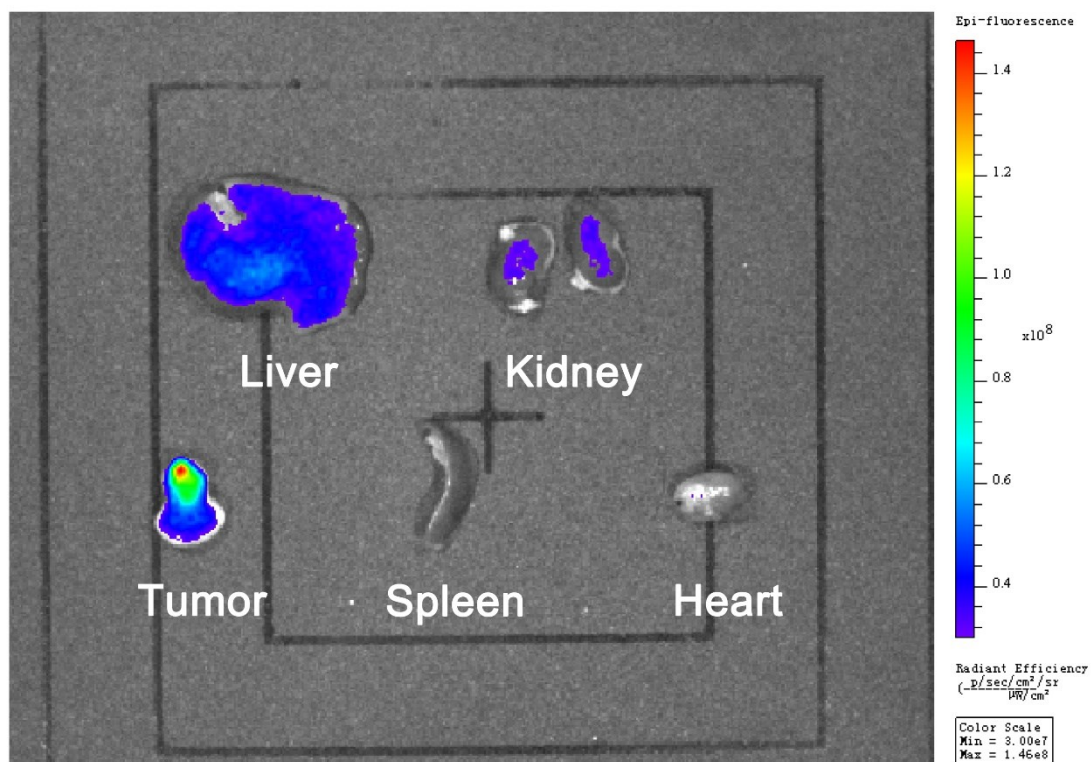

**Fig. S20.** Ex vivo various organs and tumor images obtained 24 h after caudal vein injection of UIO@Ca-Pt NPs

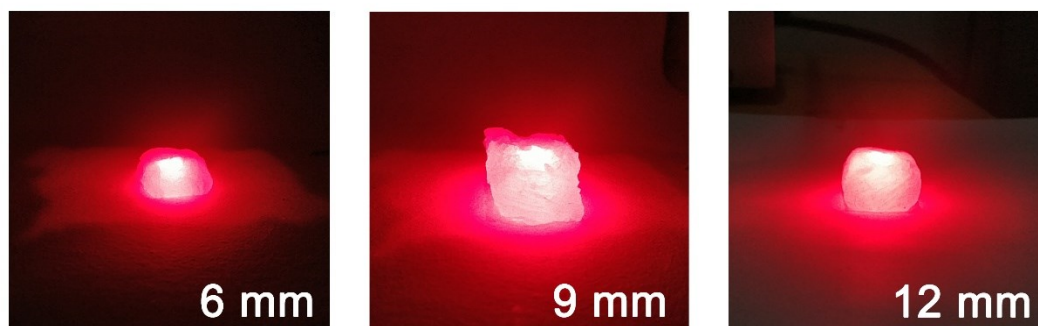

**Fig. S21** The digital photos obtained in pork muscle tissue

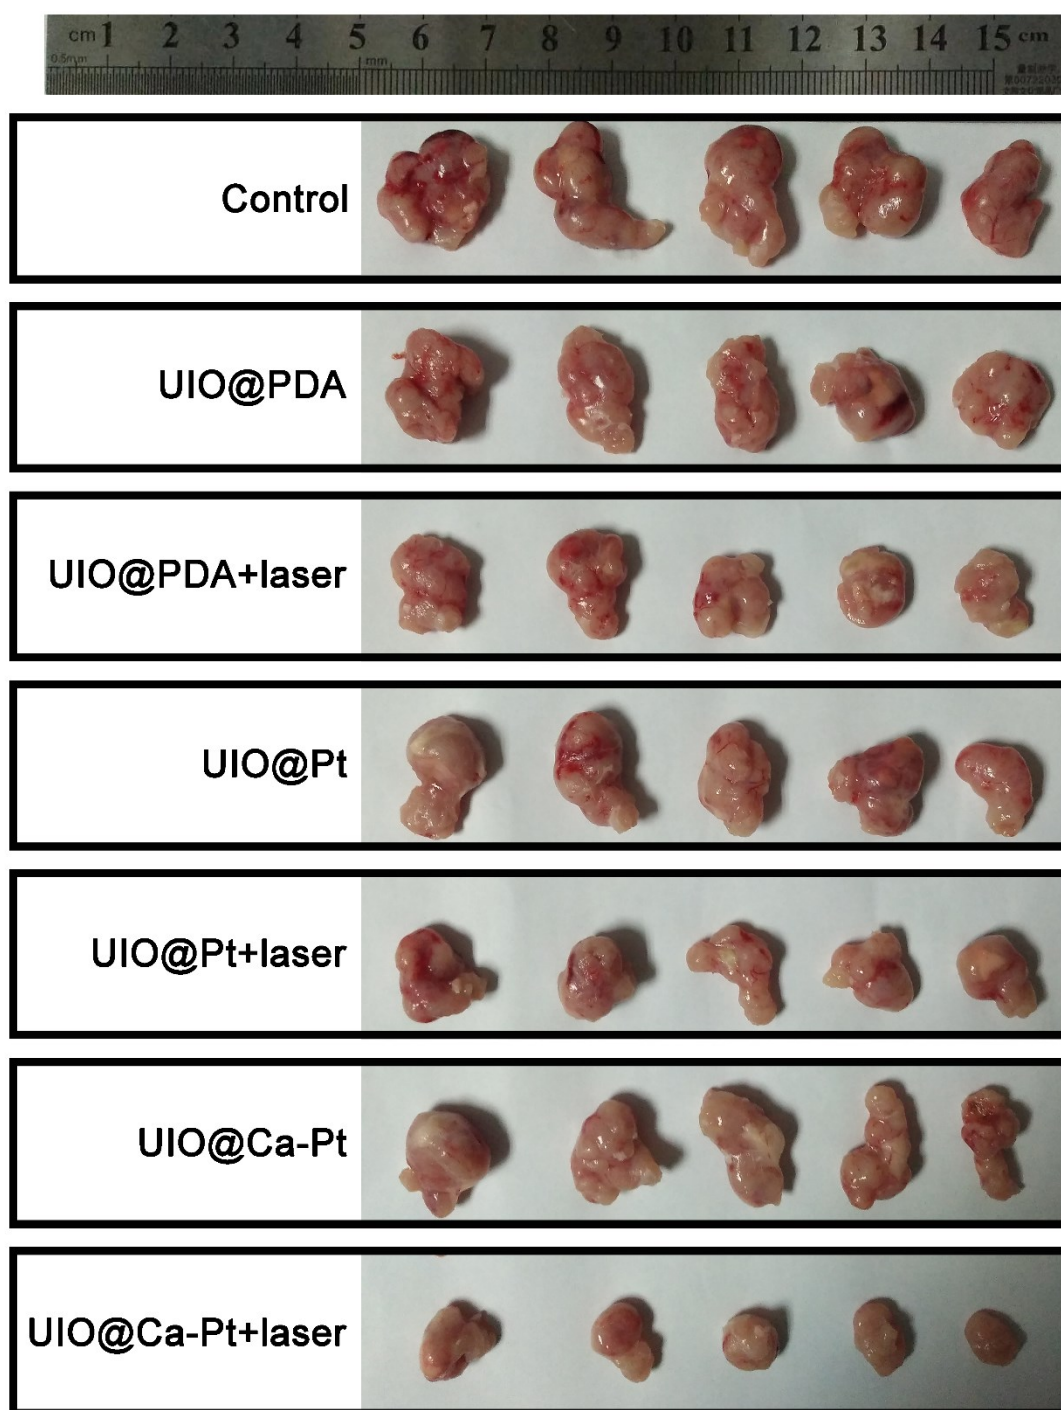

**Fig. S22.** Relative tumor volume of each group treated with UIO@PDA, UIO@PDA+Laser, UIO@Pt, UIO@Pt +Laser, UIO@Ca-Pt, UIO@Ca-Pt +Laser NPs.

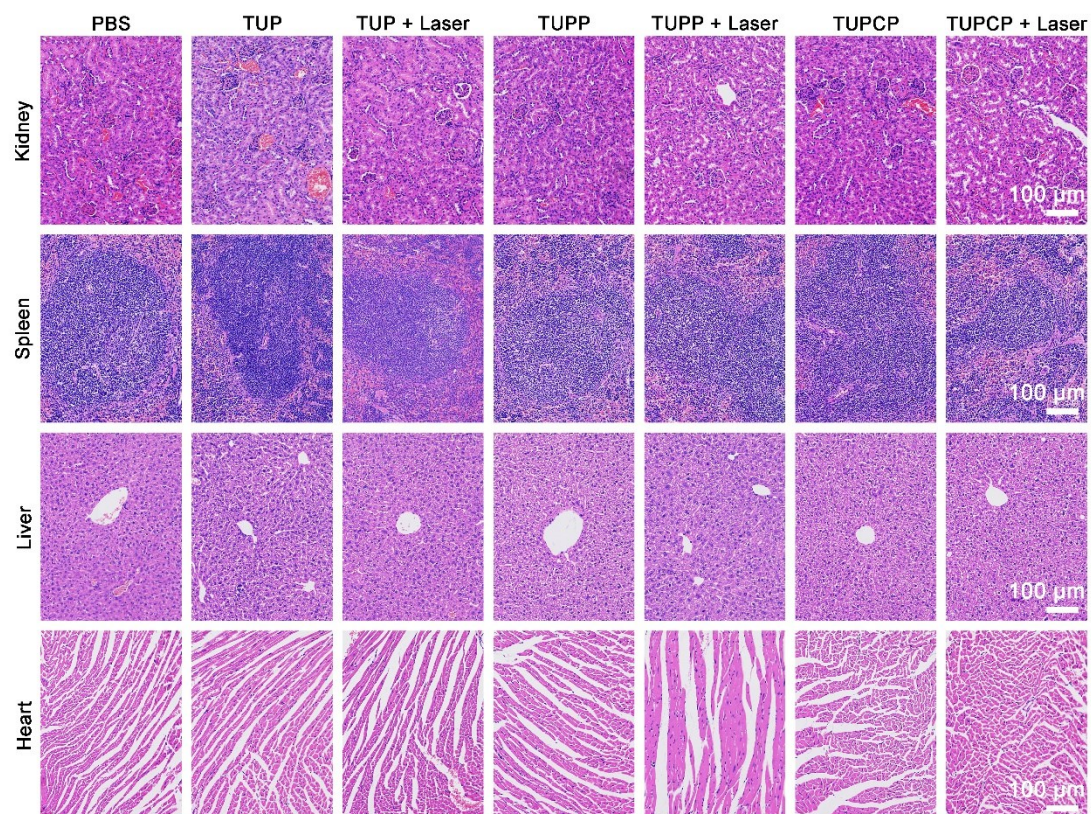

**Fig. S23.** Histological sections of major organs after treatment with PBS, UIO@PDA, UIO@PDA+Laser, UIO@Pt, UIO@Pt +Laser, UIO@Ca-Pt, UIO@Ca-Pt +Laser NPs for 12 days ( $\times 100$ ).
